# Supplementary material for: Multigene mutational profiling of cholangiocarcinomas identifies actionable molecular subgroups
Source: PubMed Central journal article supplement (PMC4058049; doi:10.18632/oncotarget.1943), 2014-05-01
Supplement: oncotarget-05-2839-s001.pdf [file oncotarget-05-2839-s001.pdf]

## Multigene mutational profiling of cholangiocarcinomas identifies actionable molecular subgroups

### Supplementary Material

**Supplementary Table 1:** Targeted regions of the Ampliseq custom panel exploring 6 genes: *ARID1A*, *BAP1*, *PBRM1*, *PIK3C2A*, *PIK3C2G*, *TGFBR2*.

| Chromosome | Start amplicon | End amplicon | Gene   |
|------------|----------------|--------------|--------|
| chr1       | 27023113       | 27023236     | ARID1A |
| chr1       | 27023236       | 27023335     | ARID1A |
| chr1       | 27023309       | 27023418     | ARID1A |
| chr1       | 27023415       | 27023518     | ARID1A |
| chr1       | 27023502       | 27023595     | ARID1A |
| chr1       | 27023684       | 27023776     | ARID1A |
| chr1       | 27023697       | 27023836     | ARID1A |
| chr1       | 27024034       | 27024137     | ARID1A |
| chr1       | 27056019       | 27056119     | ARID1A |
| chr1       | 27056119       | 27056237     | ARID1A |
| chr1       | 27056232       | 27056358     | ARID1A |
| chr1       | 27056358       | 27056438     | ARID1A |
| chr1       | 27057577       | 27057702     | ARID1A |
| chr1       | 27057702       | 27057827     | ARID1A |
| chr1       | 27057827       | 27057961     | ARID1A |
| chr1       | 27057956       | 27058065     | ARID1A |
| chr1       | 27058060       | 27058149     | ARID1A |
| chr1       | 27059099       | 27059227     | ARID1A |
| chr1       | 27059227       | 27059352     | ARID1A |
| chr1       | 27087293       | 27087411     | ARID1A |
| chr1       | 27087410       | 27087546     | ARID1A |
| chr1       | 27087545       | 27087639     | ARID1A |
| chr1       | 27087817       | 27087931     | ARID1A |
| chr1       | 27087931       | 27088018     | ARID1A |
| chr1       | 27088591       | 27088717     | ARID1A |
| chr1       | 27088715       | 27088836     | ARID1A |
| chr1       | 27088836       | 27088910     | ARID1A |
| chr1       | 27089401       | 27089525     | ARID1A |
| chr1       | 27089519       | 27089642     | ARID1A |
| chr1       | 27089632       | 27089766     | ARID1A |
| chr1       | 27089766       | 27089849     | ARID1A |
| chr1       | 27092652       | 27092767     | ARID1A |
| chr1       | 27092767       | 27092866     | ARID1A |
| chr1       | 27092866       | 27092982     | ARID1A |
| chr1       | 27093004       | 27093112     | ARID1A |
| chr1       | 27094197       | 27094298     | ARID1A |

|      |          |          |        |
|------|----------|----------|--------|
| chr1 | 27094298 | 27094424 | ARID1A |
| chr1 | 27094424 | 27094540 | ARID1A |
| chr1 | 27097483 | 27097589 | ARID1A |
| chr1 | 27097589 | 27097698 | ARID1A |
| chr1 | 27097698 | 27097779 | ARID1A |
| chr1 | 27097779 | 27097903 | ARID1A |
| chr1 | 27098921 | 27099047 | ARID1A |
| chr1 | 27099045 | 27099169 | ARID1A |
| chr1 | 27099169 | 27099252 | ARID1A |
| chr1 | 27099250 | 27099358 | ARID1A |
| chr1 | 27099358 | 27099473 | ARID1A |
| chr1 | 27099473 | 27099563 | ARID1A |
| chr1 | 27099720 | 27099843 | ARID1A |
| chr1 | 27099842 | 27099961 | ARID1A |
| chr1 | 27099961 | 27100055 | ARID1A |
| chr1 | 27100047 | 27100153 | ARID1A |
| chr1 | 27100151 | 27100274 | ARID1A |
| chr1 | 27100239 | 27100371 | ARID1A |
| chr1 | 27100371 | 27100453 | ARID1A |
| chr1 | 27100757 | 27100894 | ARID1A |
| chr1 | 27100894 | 27101000 | ARID1A |
| chr1 | 27101000 | 27101091 | ARID1A |
| chr1 | 27101088 | 27101192 | ARID1A |
| chr1 | 27101191 | 27101310 | ARID1A |
| chr1 | 27101310 | 27101441 | ARID1A |
| chr1 | 27101437 | 27101533 | ARID1A |
| chr1 | 27101533 | 27101650 | ARID1A |
| chr1 | 27101648 | 27101761 | ARID1A |
| chr1 | 27101966 | 27102045 | ARID1A |
| chr1 | 27102045 | 27102144 | ARID1A |
| chr1 | 27102144 | 27102252 | ARID1A |
| chr1 | 27105423 | 27105540 | ARID1A |
| chr1 | 27105540 | 27105641 | ARID1A |
| chr1 | 27105640 | 27105756 | ARID1A |
| chr1 | 27105756 | 27105848 | ARID1A |
| chr1 | 27105848 | 27105962 | ARID1A |
| chr1 | 27105962 | 27106049 | ARID1A |
| chr1 | 27106046 | 27106173 | ARID1A |
| chr1 | 27106172 | 27106284 | ARID1A |
| chr1 | 27106282 | 27106363 | ARID1A |
| chr1 | 27106363 | 27106494 | ARID1A |
| chr1 | 27106494 | 27106573 | ARID1A |
| chr1 | 27106571 | 27106663 | ARID1A |
| chr1 | 27106661 | 27106760 | ARID1A |
| chr1 | 27106760 | 27106852 | ARID1A |

|      |          |          |        |
|------|----------|----------|--------|
| chr1 | 27106850 | 27106958 | ARID1A |
| chr1 | 27106956 | 27107069 | ARID1A |
| chr1 | 27107068 | 27107181 | ARID1A |
| chr1 | 27107181 | 27107302 | ARID1A |
| chr3 | 30648360 | 30648456 | TGFBR2 |
| chr3 | 30648446 | 30648539 | TGFBR2 |
| chr3 | 30664759 | 30664885 | TGFBR2 |
| chr3 | 30686137 | 30686253 | TGFBR2 |
| chr3 | 30686253 | 30686356 | TGFBR2 |
| chr3 | 30686356 | 30686464 | TGFBR2 |
| chr3 | 30691680 | 30691778 | TGFBR2 |
| chr3 | 30691778 | 30691901 | TGFBR2 |
| chr3 | 30691901 | 30692002 | TGFBR2 |
| chr3 | 30713069 | 30713153 | TGFBR2 |
| chr3 | 30713153 | 30713230 | TGFBR2 |
| chr3 | 30713230 | 30713339 | TGFBR2 |
| chr3 | 30713338 | 30713467 | TGFBR2 |
| chr3 | 30713466 | 30713577 | TGFBR2 |
| chr3 | 30713577 | 30713695 | TGFBR2 |
| chr3 | 30713695 | 30713788 | TGFBR2 |
| chr3 | 30713783 | 30713903 | TGFBR2 |
| chr3 | 30713903 | 30713983 | TGFBR2 |
| chr3 | 30715540 | 30715663 | TGFBR2 |
| chr3 | 30715663 | 30715788 | TGFBR2 |
| chr3 | 30729817 | 30729943 | TGFBR2 |
| chr3 | 30729943 | 30730069 | TGFBR2 |
| chr3 | 30732806 | 30732931 | TGFBR2 |
| chr3 | 30732931 | 30733059 | TGFBR2 |
| chr3 | 30733059 | 30733169 | TGFBR2 |
| chr3 | 52436209 | 52436322 | BAP1   |
| chr3 | 52436317 | 52436457 | BAP1   |
| chr3 | 52436456 | 52436590 | BAP1   |
| chr3 | 52436538 | 52436650 | BAP1   |
| chr3 | 52436650 | 52436768 | BAP1   |
| chr3 | 52436698 | 52436809 | BAP1   |
| chr3 | 52436809 | 52436940 | BAP1   |
| chr3 | 52436993 | 52437126 | BAP1   |
| chr3 | 52437126 | 52437232 | BAP1   |
| chr3 | 52437230 | 52437364 | BAP1   |
| chr3 | 52437369 | 52437493 | BAP1   |
| chr3 | 52437493 | 52437587 | BAP1   |
| chr3 | 52437585 | 52437667 | BAP1   |
| chr3 | 52437666 | 52437798 | BAP1   |
| chr3 | 52437798 | 52437922 | BAP1   |
| chr3 | 52437916 | 52438046 | BAP1   |

|      |          |          |       |
|------|----------|----------|-------|
| chr3 | 52438403 | 52438530 | BAP1  |
| chr3 | 52438530 | 52438653 | BAP1  |
| chr3 | 52439064 | 52439187 | BAP1  |
| chr3 | 52439187 | 52439321 | BAP1  |
| chr3 | 52439320 | 52439428 | BAP1  |
| chr3 | 52439726 | 52439857 | BAP1  |
| chr3 | 52439857 | 52439978 | BAP1  |
| chr3 | 52440194 | 52440317 | BAP1  |
| chr3 | 52440313 | 52440446 | BAP1  |
| chr3 | 52440706 | 52440810 | BAP1  |
| chr3 | 52440809 | 52440937 | BAP1  |
| chr3 | 52440937 | 52441027 | BAP1  |
| chr3 | 52441114 | 52441202 | BAP1  |
| chr3 | 52441202 | 52441297 | BAP1  |
| chr3 | 52441295 | 52441411 | BAP1  |
| chr3 | 52441427 | 52441526 | BAP1  |
| chr3 | 52441889 | 52442000 | BAP1  |
| chr3 | 52442000 | 52442081 | BAP1  |
| chr3 | 52442081 | 52442170 | BAP1  |
| chr3 | 52442429 | 52442554 | BAP1  |
| chr3 | 52442552 | 52442673 | BAP1  |
| chr3 | 52443462 | 52443581 | BAP1  |
| chr3 | 52443581 | 52443710 | BAP1  |
| chr3 | 52443730 | 52443862 | BAP1  |
| chr3 | 52443751 | 52443884 | BAP1  |
| chr3 | 52582021 | 52582118 | PBRM1 |
| chr3 | 52582117 | 52582211 | PBRM1 |
| chr3 | 52582206 | 52582301 | PBRM1 |
| chr3 | 52584383 | 52584453 | PBRM1 |
| chr3 | 52584451 | 52584564 | PBRM1 |
| chr3 | 52584564 | 52584689 | PBRM1 |
| chr3 | 52584689 | 52584812 | PBRM1 |
| chr3 | 52584832 | 52584919 | PBRM1 |
| chr3 | 52588688 | 52588819 | PBRM1 |
| chr3 | 52588817 | 52588899 | PBRM1 |
| chr3 | 52588898 | 52588977 | PBRM1 |
| chr3 | 52595686 | 52595794 | PBRM1 |
| chr3 | 52595794 | 52595907 | PBRM1 |
| chr3 | 52595907 | 52596035 | PBRM1 |
| chr3 | 52597179 | 52597266 | PBRM1 |
| chr3 | 52597266 | 52597367 | PBRM1 |
| chr3 | 52597367 | 52597455 | PBRM1 |
| chr3 | 52597455 | 52597559 | PBRM1 |
| chr3 | 52598017 | 52598121 | PBRM1 |
| chr3 | 52598107 | 52598178 | PBRM1 |

|      |          |          |       |
|------|----------|----------|-------|
| chr3 | 52610566 | 52610654 | PBRM1 |
| chr3 | 52610575 | 52610698 | PBRM1 |
| chr3 | 52613018 | 52613142 | PBRM1 |
| chr3 | 52613142 | 52613265 | PBRM1 |
| chr3 | 52620331 | 52620413 | PBRM1 |
| chr3 | 52620409 | 52620501 | PBRM1 |
| chr3 | 52620501 | 52620588 | PBRM1 |
| chr3 | 52620585 | 52620667 | PBRM1 |
| chr3 | 52620667 | 52620782 | PBRM1 |
| chr3 | 52621293 | 52621364 | PBRM1 |
| chr3 | 52621359 | 52621452 | PBRM1 |
| chr3 | 52621410 | 52621488 | PBRM1 |
| chr3 | 52623002 | 52623107 | PBRM1 |
| chr3 | 52623107 | 52623209 | PBRM1 |
| chr3 | 52623209 | 52623327 | PBRM1 |
| chr3 | 52637473 | 52637594 | PBRM1 |
| chr3 | 52637502 | 52637633 | PBRM1 |
| chr3 | 52637646 | 52637744 | PBRM1 |
| chr3 | 52637671 | 52637783 | PBRM1 |
| chr3 | 52643260 | 52643373 | PBRM1 |
| chr3 | 52643373 | 52643483 | PBRM1 |
| chr3 | 52643481 | 52643614 | PBRM1 |
| chr3 | 52643609 | 52643733 | PBRM1 |
| chr3 | 52643733 | 52643828 | PBRM1 |
| chr3 | 52643826 | 52643947 | PBRM1 |
| chr3 | 52643946 | 52644034 | PBRM1 |
| chr3 | 52649240 | 52649366 | PBRM1 |
| chr3 | 52649365 | 52649445 | PBRM1 |
| chr3 | 52649445 | 52649528 | PBRM1 |
| chr3 | 52651206 | 52651327 | PBRM1 |
| chr3 | 52651327 | 52651451 | PBRM1 |
| chr3 | 52651420 | 52651522 | PBRM1 |
| chr3 | 52651507 | 52651609 | PBRM1 |
| chr3 | 52661255 | 52661328 | PBRM1 |
| chr3 | 52661327 | 52661408 | PBRM1 |
| chr3 | 52661395 | 52661463 | PBRM1 |
| chr3 | 52662843 | 52662946 | PBRM1 |
| chr3 | 52662946 | 52663012 | PBRM1 |
| chr3 | 52668538 | 52668606 | PBRM1 |
| chr3 | 52668588 | 52668705 | PBRM1 |
| chr3 | 52668705 | 52668820 | PBRM1 |
| chr3 | 52668820 | 52668894 | PBRM1 |
| chr3 | 52675881 | 52676001 | PBRM1 |
| chr3 | 52676000 | 52676119 | PBRM1 |
| chr3 | 52677200 | 52677290 | PBRM1 |

|       |          |          |         |
|-------|----------|----------|---------|
| chr3  | 52677290 | 52677410 | PBRM1   |
| chr3  | 52678715 | 52678833 | PBRM1   |
| chr3  | 52678744 | 52678872 | PBRM1   |
| chr3  | 52682328 | 52682419 | PBRM1   |
| chr3  | 52682403 | 52682479 | PBRM1   |
| chr3  | 52685666 | 52685741 | PBRM1   |
| chr3  | 52685738 | 52685837 | PBRM1   |
| chr3  | 52685801 | 52685911 | PBRM1   |
| chr3  | 52692123 | 52692208 | PBRM1   |
| chr3  | 52692208 | 52692318 | PBRM1   |
| chr3  | 52692318 | 52692401 | PBRM1   |
| chr3  | 52696017 | 52696126 | PBRM1   |
| chr3  | 52696126 | 52696229 | PBRM1   |
| chr3  | 52696229 | 52696352 | PBRM1   |
| chr3  | 52702494 | 52702601 | PBRM1   |
| chr3  | 52702563 | 52702637 | PBRM1   |
| chr3  | 52712432 | 52712550 | PBRM1   |
| chr3  | 52712550 | 52712645 | PBRM1   |
| chr3  | 52712616 | 52712689 | PBRM1   |
| chr3  | 52713513 | 52713601 | PBRM1   |
| chr3  | 52713601 | 52713721 | PBRM1   |
| chr3  | 52713721 | 52713806 | PBRM1   |
| chr11 | 17111142 | 17111256 | PIK3C2A |
| chr11 | 17111256 | 17111330 | PIK3C2A |
| chr11 | 17111330 | 17111414 | PIK3C2A |
| chr11 | 17111414 | 17111519 | PIK3C2A |
| chr11 | 17112899 | 17112971 | PIK3C2A |
| chr11 | 17112963 | 17113047 | PIK3C2A |
| chr11 | 17113047 | 17113151 | PIK3C2A |
| chr11 | 17113151 | 17113270 | PIK3C2A |
| chr11 | 17113446 | 17113560 | PIK3C2A |
| chr11 | 17113560 | 17113683 | PIK3C2A |
| chr11 | 17113635 | 17113748 | PIK3C2A |
| chr11 | 17115752 | 17115864 | PIK3C2A |
| chr11 | 17115864 | 17115975 | PIK3C2A |
| chr11 | 17118525 | 17118647 | PIK3C2A |
| chr11 | 17118675 | 17118756 | PIK3C2A |
| chr11 | 17118756 | 17118831 | PIK3C2A |
| chr11 | 17118817 | 17118888 | PIK3C2A |
| chr11 | 17121289 | 17121408 | PIK3C2A |
| chr11 | 17121386 | 17121478 | PIK3C2A |
| chr11 | 17121471 | 17121580 | PIK3C2A |
| chr11 | 17122830 | 17122906 | PIK3C2A |
| chr11 | 17122876 | 17122948 | PIK3C2A |
| chr11 | 17122948 | 17123052 | PIK3C2A |

|       |          |          |         |
|-------|----------|----------|---------|
| chr11 | 17124153 | 17124249 | PIK3C2A |
| chr11 | 17124249 | 17124335 | PIK3C2A |
| chr11 | 17124330 | 17124404 | PIK3C2A |
| chr11 | 17126643 | 17126725 | PIK3C2A |
| chr11 | 17126709 | 17126819 | PIK3C2A |
| chr11 | 17126814 | 17126884 | PIK3C2A |
| chr11 | 17131896 | 17132016 | PIK3C2A |
| chr11 | 17132016 | 17132123 | PIK3C2A |
| chr11 | 17135825 | 17135942 | PIK3C2A |
| chr11 | 17135942 | 17136064 | PIK3C2A |
| chr11 | 17138966 | 17139050 | PIK3C2A |
| chr11 | 17139050 | 17139147 | PIK3C2A |
| chr11 | 17139147 | 17139225 | PIK3C2A |
| chr11 | 17140116 | 17140231 | PIK3C2A |
| chr11 | 17140238 | 17140314 | PIK3C2A |
| chr11 | 17140715 | 17140799 | PIK3C2A |
| chr11 | 17140799 | 17140919 | PIK3C2A |
| chr11 | 17141277 | 17141378 | PIK3C2A |
| chr11 | 17141372 | 17141446 | PIK3C2A |
| chr11 | 17141429 | 17141499 | PIK3C2A |
| chr11 | 17143698 | 17143808 | PIK3C2A |
| chr11 | 17143749 | 17143851 | PIK3C2A |
| chr11 | 17144169 | 17144244 | PIK3C2A |
| chr11 | 17144244 | 17144339 | PIK3C2A |
| chr11 | 17144320 | 17144417 | PIK3C2A |
| chr11 | 17150784 | 17150903 | PIK3C2A |
| chr11 | 17150903 | 17150996 | PIK3C2A |
| chr11 | 17153405 | 17153490 | PIK3C2A |
| chr11 | 17153450 | 17153533 | PIK3C2A |
| chr11 | 17156361 | 17156440 | PIK3C2A |
| chr11 | 17156440 | 17156548 | PIK3C2A |
| chr11 | 17156548 | 17156658 | PIK3C2A |
| chr11 | 17156683 | 17156769 | PIK3C2A |
| chr11 | 17157917 | 17158037 | PIK3C2A |
| chr11 | 17158037 | 17158142 | PIK3C2A |
| chr11 | 17158130 | 17158222 | PIK3C2A |
| chr11 | 17167162 | 17167250 | PIK3C2A |
| chr11 | 17167250 | 17167355 | PIK3C2A |
| chr11 | 17167319 | 17167396 | PIK3C2A |
| chr11 | 17167501 | 17167565 | PIK3C2A |
| chr11 | 17168948 | 17169071 | PIK3C2A |
| chr11 | 17169070 | 17169144 | PIK3C2A |
| chr11 | 17169144 | 17169242 | PIK3C2A |
| chr11 | 17170192 | 17170271 | PIK3C2A |
| chr11 | 17170267 | 17170359 | PIK3C2A |

|       |          |          |         |
|-------|----------|----------|---------|
| chr11 | 17171960 | 17172037 | PIK3C2A |
| chr11 | 17172037 | 17172164 | PIK3C2A |
| chr11 | 17172164 | 17172269 | PIK3C2A |
| chr11 | 17176978 | 17177097 | PIK3C2A |
| chr11 | 17177034 | 17177151 | PIK3C2A |
| chr11 | 17177151 | 17177257 | PIK3C2A |
| chr11 | 17190191 | 17190283 | PIK3C2A |
| chr11 | 17190277 | 17190359 | PIK3C2A |
| chr11 | 17190359 | 17190460 | PIK3C2A |
| chr11 | 17190460 | 17190535 | PIK3C2A |
| chr11 | 17190535 | 17190660 | PIK3C2A |
| chr11 | 17190660 | 17190765 | PIK3C2A |
| chr11 | 17190765 | 17190884 | PIK3C2A |
| chr11 | 17190884 | 17190984 | PIK3C2A |
| chr11 | 17190984 | 17191068 | PIK3C2A |
| chr11 | 17191068 | 17191158 | PIK3C2A |
| chr11 | 17191158 | 17191277 | PIK3C2A |
| chr11 | 17191277 | 17191344 | PIK3C2A |
| chr12 | 18434980 | 18435048 | PIK3C2G |
| chr12 | 18435046 | 18435142 | PIK3C2G |
| chr12 | 18435142 | 18435249 | PIK3C2G |
| chr12 | 18435249 | 18435328 | PIK3C2G |
| chr12 | 18435328 | 18435415 | PIK3C2G |
| chr12 | 18435415 | 18435521 | PIK3C2G |
| chr12 | 18435475 | 18435551 | PIK3C2G |
| chr12 | 18435617 | 18435724 | PIK3C2G |
| chr12 | 18435684 | 18435753 | PIK3C2G |
| chr12 | 18439712 | 18439822 | PIK3C2G |
| chr12 | 18439823 | 18439920 | PIK3C2G |
| chr12 | 18443711 | 18443786 | PIK3C2G |
| chr12 | 18443771 | 18443843 | PIK3C2G |
| chr12 | 18443838 | 18443913 | PIK3C2G |
| chr12 | 18443890 | 18443991 | PIK3C2G |
| chr12 | 18466832 | 18466934 | PIK3C2G |
| chr12 | 18466908 | 18467008 | PIK3C2G |
| chr12 | 18467001 | 18467068 | PIK3C2G |
| chr12 | 18473827 | 18473902 | PIK3C2G |
| chr12 | 18473906 | 18473986 | PIK3C2G |
| chr12 | 18477887 | 18478005 | PIK3C2G |
| chr12 | 18491276 | 18491391 | PIK3C2G |
| chr12 | 18491369 | 18491463 | PIK3C2G |
| chr12 | 18496160 | 18496272 | PIK3C2G |
| chr12 | 18496295 | 18496420 | PIK3C2G |
| chr12 | 18499523 | 18499599 | PIK3C2G |
| chr12 | 18499599 | 18499714 | PIK3C2G |



|       |          |          |         |
|-------|----------|----------|---------|
| chr12 | 18499713 | 18499832 | PIK3C2G |
| chr12 | 18524053 | 18524128 | PIK3C2G |
| chr12 | 18524102 | 18524186 | PIK3C2G |
| chr12 | 18524183 | 18524267 | PIK3C2G |
| chr12 | 18524243 | 18524322 | PIK3C2G |
| chr12 | 18534577 | 18534701 | PIK3C2G |
| chr12 | 18534701 | 18534802 | PIK3C2G |
| chr12 | 18534798 | 18534897 | PIK3C2G |
| chr12 | 18544027 | 18544109 | PIK3C2G |
| chr12 | 18544103 | 18544196 | PIK3C2G |
| chr12 | 18544192 | 18544268 | PIK3C2G |
| chr12 | 18552556 | 18552631 | PIK3C2G |
| chr12 | 18552558 | 18552657 | PIK3C2G |
| chr12 | 18552741 | 18552813 | PIK3C2G |
| chr12 | 18573815 | 18573926 | PIK3C2G |
| chr12 | 18573926 | 18574049 | PIK3C2G |
| chr12 | 18576802 | 18576896 | PIK3C2G |
| chr12 | 18576896 | 18577023 | PIK3C2G |
| chr12 | 18641297 | 18641414 | PIK3C2G |
| chr12 | 18641393 | 18641509 | PIK3C2G |
| chr12 | 18641499 | 18641580 | PIK3C2G |
| chr12 | 18641567 | 18641640 | PIK3C2G |
| chr12 | 18644305 | 18644385 | PIK3C2G |
| chr12 | 18644349 | 18644434 | PIK3C2G |
| chr12 | 18644485 | 18644564 | PIK3C2G |
| chr12 | 18648907 | 18649018 | PIK3C2G |
| chr12 | 18649003 | 18649084 | PIK3C2G |
| chr12 | 18649082 | 18649155 | PIK3C2G |
| chr12 | 18650467 | 18650581 | PIK3C2G |
| chr12 | 18650581 | 18650655 | PIK3C2G |
| chr12 | 18650647 | 18650733 | PIK3C2G |
| chr12 | 18656134 | 18656253 | PIK3C2G |
| chr12 | 18656253 | 18656349 | PIK3C2G |
| chr12 | 18656349 | 18656420 | PIK3C2G |
| chr12 | 18658170 | 18658261 | PIK3C2G |
| chr12 | 18658259 | 18658346 | PIK3C2G |
| chr12 | 18658346 | 18658448 | PIK3C2G |
| chr12 | 18691042 | 18691157 | PIK3C2G |
| chr12 | 18691121 | 18691201 | PIK3C2G |
| chr12 | 18699171 | 18699248 | PIK3C2G |
| chr12 | 18699248 | 18699361 | PIK3C2G |
| chr12 | 18699361 | 18699436 | PIK3C2G |
| chr12 | 18715547 | 18715673 | PIK3C2G |
| chr12 | 18715672 | 18715761 | PIK3C2G |
| chr12 | 18715761 | 18715878 | PIK3C2G |

|       |          |          |         |
|-------|----------|----------|---------|
| chr12 | 18716224 | 18716327 | PIK3C2G |
| chr12 | 18716324 | 18716403 | PIK3C2G |
| chr12 | 18716402 | 18716514 | PIK3C2G |
| chr12 | 18719824 | 18719899 | PIK3C2G |
| chr12 | 18747382 | 18747454 | PIK3C2G |
| chr12 | 18747383 | 18747478 | PIK3C2G |
| chr12 | 18762388 | 18762463 | PIK3C2G |
| chr12 | 18762449 | 18762523 | PIK3C2G |
| chr12 | 18762523 | 18762614 | PIK3C2G |
| chr12 | 18793285 | 18793406 | PIK3C2G |
| chr12 | 18793406 | 18793487 | PIK3C2G |
| chr12 | 18793487 | 18793567 | PIK3C2G |
| chr12 | 18800706 | 18800827 | PIK3C2G |
| chr12 | 18800828 | 18800901 | PIK3C2G |
| chr12 | 18800910 | 18801028 | PIK3C2G |
